# Supplementary material for: Impact of Prominent Themes in Clinician-Patient Conversations on Caregiver’s Perceived Quality of Communication with Paediatric Dental Visits
Source: PLOS journal article supplement (doi:10.1371/journal.pone.0169059), 2017-01-03
Supplement: S3 (10.1371/journal.pone.0169059.s003) [file journal.pone.0169059.s003]

**S3 Table. The summary details of conversation and counts of the variables about five principal components in the sample conversation 1.**

| Conversation 1        |        |     |                         |                    |                     | PC1                        |                                 |                         | PC2                        |                                 |                         | PC3                        |                                 |                         | PC4                        |                                 |                         | PC5                        |                                 |                         |
|-----------------------|--------|-----|-------------------------|--------------------|---------------------|----------------------------|---------------------------------|-------------------------|----------------------------|---------------------------------|-------------------------|----------------------------|---------------------------------|-------------------------|----------------------------|---------------------------------|-------------------------|----------------------------|---------------------------------|-------------------------|
| Score of satisfaction | Gender | Age | total no. of utterances | Total no. of words | Total time duration | Total no. of related words | Total no. of related utterances | Total time spent on (s) | Total no. of related words | Total no. of related utterances | Total time spent on (s) | Total no. of related words | Total no. of related utterances | Total time spent on (s) | Total no. of related words | Total no. of related utterances | Total time spent on (s) | Total no. of related words | Total no. of related utterances | Total time spent on (s) |
| 57                    | M      | 7   | 111                     | 584                | 267.1               | 39                         | 25                              | 89.97                   | 11                         | 10                              | 43.78                   | 8                          | 7                               | 21.64                   | 5                          | 5                               | 12.95                   | 6                          | 6                               | 24.23                   |
|                       |        |     |                         |                    |                     | % of related words         | % of related utterances         | % of time spent on      | % of related words         | % of related utterances         | % of time spent on      | % of related words         | % of related utterances         | % of time spent on      | % of related words         | % of related utterances         | % of time spent on      | % of related words         | % of related utterances         | % of time spent on      |
|                       |        |     |                         |                    |                     | 66.78                      | 22.52                           | 33.81                   | 1.88                       | 9.01                            | 16.45                   | 1.37                       | 6.31                            | 8.13                    | 0.86                       | 4.50                            | 4.87                    | 1.03                       | 5.41                            | 9.11                    |
